# Supplementary material for: Annual Crops Contribute More Predators than Perennial Habitats during an Aphid Outbreak
Source: MDPI journal article supplement (doi:10.3390/insects14070624), 2023-07-11
Supplement: s1 [file s1]

## Supplementary materials

Table S1. Field locale, the latitude and longitude of each soybean field site, field size in hectares (ha), the adjacent habitat where bi-directional Malaise traps were placed, and the vegetative (V) and reproductive (R) stage of soybean from field plant counts (n=20) in 2017. For growth stages with NA's, plant counts were not conducted in these fields. Woody vegetation included saskatoon (*Amelanchier alnifolia* (Nutt.) Nutt.) and chokecherry (*Prunus virginiana* L.) bushes, a grassy understorey, and an overstorey dominated by deciduous trees, mainly white poplar (*Populus* spp.), oak (*Quercus* spp.), Manitoba maple (*Acer negundo* L.), and American elm (*Ulmus americana* L.).

| Field name | Latitude     | Longitude    | Adjacent habitat | Median soybean growth stage |          |          |
|------------|--------------|--------------|------------------|-----------------------------|----------|----------|
|            |              |              |                  | Week 0                      | Week 1   | Week 2   |
| bar7       | 50°34'01.9"N | 97°00'32.7"W | Woody vegetation | V6, R2                      | V8, R2   | V7, R2.5 |
| col7       | 50°22'13.4"N | 96°27'04.4"W | Alfalfa          | V7, R2                      | V8, R2   | V9, R3   |
| cra7       | 49°20'57.1"N | 97°25'56.4"W | Canola           | NA                          | V10, R3  | V10, R4  |
| dea7       | 49°54'15.3"N | 98°00'01.9"W | Spring wheat     | NA                          | V7, R3   | V9, R2   |
| den7       | 49°01'45.3"N | 97°05'01.4"W | Woody vegetation | V6, R2                      | V9, R3   | V10, R3  |
| gle7       | 50°16'15.8"N | 96°28'14.9"W | Alfalfa          | V6, R3                      | V7.5, R2 | V9, R3   |
| mar7       | 50°00'13.5"N | 96°25'08.8"W | Woody vegetation | V7, R3                      | V10, R2  | V10, R3  |
| mik7       | 49°15'23.5"N | 97°07'37.4"W | Spring wheat     | V5, R1                      | V9, R3   | V9, R3   |
| par7       | 49°34'13.3"N | 98°01'05.4"W | Spring wheat     | NA                          | V8, R2   | V9, R3   |
| pen7       | 49°38'46.8"N | 97°54'30.4"W | Canola           | NA                          | V9, R3   | V9, R2   |
| ran7       | 49°10'02.4"N | 97°54'39.3"W | Canola           | V7, R3                      | V9, R5   | V8.5, R5 |
| ste7       | 49°52'31.0"N | 98°02'45.3"W | Alfalfa          | NA                          | V8, R3   | V9, R2   |

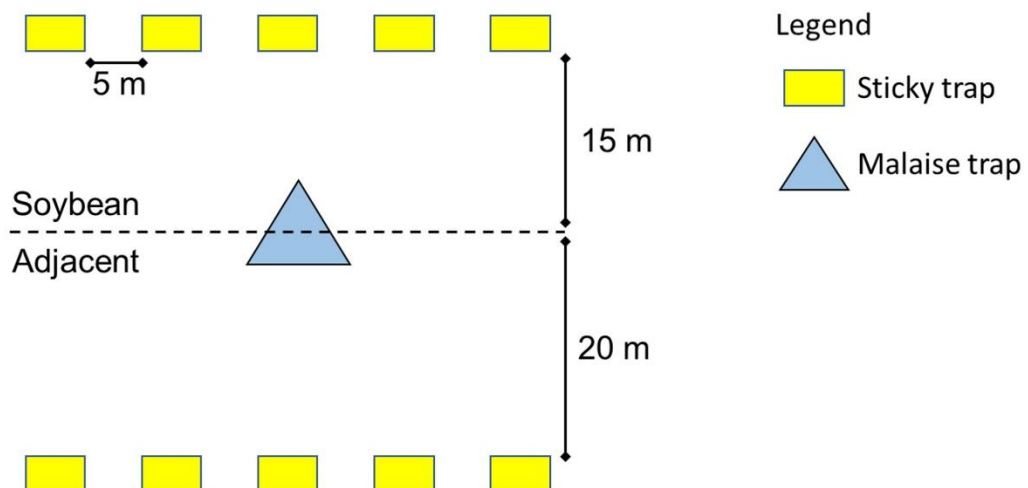

Figure S1. Sticky trap and bi-directional Malaise trap placement per field site.

Table S2. Comparing predator abundance in soybean and across adjacent habitats. The average number of individuals captured per day in sticky traps ( $\pm$  the standard error, S.E.) in soybean (n=12), alfalfa (n=3), canola (n=3), spring wheat (n=3), and woody vegetation (n=3). In each field, counts of the five sticky traps were summed prior to averaging across weeks and fields (n=48).

|                                    | Soybean            | Alfalfa           | Canola             | Wheat             | Woody             |
|------------------------------------|--------------------|-------------------|--------------------|-------------------|-------------------|
| Coccinellids                       | $2.57 \pm 0.61$    | $0.43 \pm 0.19$   | $0.16 \pm 0.064$   | $1.50 \pm 0.31$   | $0.48 \pm 0.41$   |
| <i>Coccinella septempunctata</i>   | $0.64 \pm 0.23$    | $0.29 \pm 0.14$   | $0.071 \pm 0.071$  | $0.89 \pm 0.22$   | 0                 |
| <i>Harmonia axyridis</i>           | $1.00 \pm 0.31$    | 0                 | 0                  | 0                 | $0.071 \pm 0.041$ |
| <i>Hippodamia variegata</i>        | $0.22 \pm 0.18$    | 0                 | 0                  | $0.11 \pm 0.11$   | 0                 |
| <i>Hippodamia parenthesis</i>      | $0.094 \pm 0.069$  | $0.024 \pm 0.024$ | 0                  | $0.024 \pm 0.024$ | 0                 |
| <i>Hippodamia convergens</i>       | $0.012 \pm 0.0080$ | 0                 | 0                  | 0                 | 0                 |
| <i>Hippodamia tredecimpunctata</i> | $0.60 \pm 0.16$    | $0.048 \pm 0.024$ | $0.068 \pm 0.0030$ | $0.47 \pm 0.087$  | 0                 |
| <i>Coccinella trifasciata</i>      | $0.012 \pm 0.0080$ | $0.048 \pm 0.048$ | 0                  | 0                 | 0                 |
| <i>Psyllobora vigintimaculata</i>  | 0                  | $0.024 \pm 0.024$ | 0                  | 0                 | $0.40 \pm 0.40$   |
| <i>Coleomegilla maculata</i>       | 0                  | 0                 | $0.024 \pm 0.024$  | 0                 | 0                 |
| Syrphids <sup>ab</sup>             | $80.4 \pm 17.0$    | $8.45 \pm 0.78$   | $87.4 \pm 13.1$    | $48.2 \pm 20.5$   | $23.0 \pm 20.3$   |
| <i>Toxomerus marginatus</i>        | $11.5 \pm 3.61$    | $1.40 \pm 0.72$   | $10.7 \pm 1.24$    | $3.22 \pm 1.92$   | $0.30 \pm 0.044$  |

|                                           | Soybean         | Alfalfa       | Canola        | Wheat         | Woody         |
|-------------------------------------------|-----------------|---------------|---------------|---------------|---------------|
| All other predators combined <sup>c</sup> | 2.45 ± 0.54     | 0.93 ± 0.41   | 1.34 ± 0.39   | 1.45 ± 0.78   | 0.64 ± 0.30   |
| Chrysopids                                | 0.23 ± 0.070    | 0.071 ± 0.00  | 0.024 ± 0.024 | 0.095 ± 0.063 | 0.12 ± 0.086  |
| <i>Chrysoperla carnea</i>                 | 0.19 ± 0.064    | 0.048 ± 0.024 | 0.024 ± 0.024 | 0.095 ± 0.063 | 0             |
| <i>Chrysopa oculata</i>                   | 0.030 ± 0.014   | 0.024 ± 0.024 | 0             | 0             | 0             |
| <i>Chrysopa chi</i>                       | 0.0060 ± 0.0060 | 0             | 0             | 0             | 0.095 ± 0.095 |
| Hemerobiids                               | 0.0060 ± 0.0060 | 0             | 0             | 0.024 ± 0.024 | 0             |
| Anthocorids                               | 1.69 ± 0.55     | 0.36 ± 0.16   | 0.41 ± 0.28   | 0.91 ± 0.74   | 0.024 ± 0.024 |
| Nabids                                    | 0               | 0.024 ± 0.024 | 0             | 0             | 0             |
| Staphylinids                              | 0.52 ± 0.061    | 0.48 ± 0.23   | 0.91 ± 0.089  | 0.42 ± 0.043  | 0.50 ± 0.36   |

<sup>a</sup> *E. americanus* was not identified as identification by genitalia was not possible.

<sup>b</sup> *T. marginatus* was not identified due to low captures observed in Malaise traps.

<sup>c</sup> All other predators combined includes chrysopids, hemerobiids, anthocorids, nabids, and staphylinids.

Table S3. Average predator movement into soybean, movement out of soybean, and bi-directional movement (average into + out of soybean) per day, and the total number of individuals captured moving in soybean (n=12 fields). Averaged values were averaged across weeks prior to averaging across field sites.

| Family Species                                        | Into soybean | Out of soybean | Bi-directional | Total captured |
|-------------------------------------------------------|--------------|----------------|----------------|----------------|
| Coccinellidae                                         | 1.49         | 0.74           | 2.23           | 359            |
| <i>Coccinella septempunctata</i> Linnaeus, 1758       | 0.96         | 0.52           | 1.48           | 243            |
| <i>Harmonia axyridis</i> (Pallas, 1773)               | 0.12         | 0.084          | 0.20           | 35             |
| <i>Hippodamia variegata</i> (Goeze, 1777)             | 0.0052       | 0              | 0.0052         | 1              |
| <i>Hippodamia parenthesis</i> (Say, 1824)             | 0.032        | 0.018          | 0.05           | 8              |
| <i>Hippodamia convergens</i> Guerin, 1842             | 0.14         | 0.034          | 0.17           | 28             |
| <i>Hippodamia tredecimpunctata</i> (Linnaeus, 1758)   | 0.2          | 0.071          | 0.27           | 45             |
| <i>Coccinella trifasciata perplexa</i> Linnaeus, 1758 | 0.018        | 0.012          | 0.03           | 5              |
| <i>Brachiancantha ursina</i> (Fabricius, 1787)        | 0.007        | 0              | 0.007          | 1              |
| <i>Adula bipunctata</i> (Linnaeus, 1758)              | 0            | 0.006          | 0.006          | 1              |
| Staphylinidae                                         | 0.98         | 1.68           | 2.66           | 458            |
| Syrphidae                                             | 108.92       | 75.43          | 184.35         | 31,174         |
| <i>Toxomerus marginatus</i> (Say, 1823)               | 29.38        | 30.23          | 59.61          | 10,231         |
| <i>Toxomerus geminatus</i> (Say, 1823)                | 1.03         | 0.58           | 1.61           | 270            |
| <i>Eupeodes americanus</i> (Wiedemann, 1830)          | 71.28        | 40.56          | 111.84         | 18,584         |
| Chrysopidae                                           | 0.4          | 0.42           | 0.82           | 134            |
| <i>Chrysoperla carnea</i> (Stephens, 1836)            | 0.24         | 0.28           | 0.52           | 87             |
| <i>Chrysopa oculata</i> Say, 1839                     | 0.13         | 0.12           | 0.25           | 42             |
| <i>Chrysopa chi</i> Fitch, 1855                       | 0.006        | 0              | 0.006          | 1              |
| <i>Chrysopa quadripunctata</i> Burmeister, 1839       | 0            | 0.006          | 0.006          | 1              |
| <i>Meleoma emuncta</i> (Fitch, 1855)                  | 0.006        | 0.0012         | 0.007          | 3              |
| Hemerobiidae                                          | 0.24         | 0.14           | 0.38           | 68             |
| <i>Hemerobius stigma</i> Stephens, 1836               | 0.15         | 0.077          | 0.23           | 39             |
| <i>Hemerobius simulans</i> Walker, 1953               | 0            | 0.0052         | 0.0052         | 1              |
| <i>Micromus angulatus</i> (Stephens, 1836)            | 0.03         | 0.024          | 0.054          | 9              |
| <i>Micromus subanticus</i> (Walker, 1853)             | 0.055        | 0.031          | 0.086          | 14             |
| <i>Symphorobius amicus</i> (Fitch, 1855)              | 0.0052       | 0.0052         | 0.010          | 2              |
| Anthocoridae                                          | 0.025        | 0.1            | 0.13           | 21             |
| Nabidae                                               | 0.12         | 0.036          | 0.16           | 26             |

Table S4. Effects of movement direction (into or out of soybean), adjacent habitat type (alfalfa, canola, spring wheat, woody vegetation), and week (1 or 2) on predator bi-directional movement in soybean from a linear mixed effects model (n=48). Number of parameters (k), corrected Akaike's information criterion (AIC<sub>c</sub>), Akaike's weights ( $w_i$ ), log-likelihood (Log-lik), ratio of log-likelihood tests (L ratio), and the significance of the models compared (p-value) are presented. Models in bold were selected as the best model by AIC and log-likelihood tests.

| Statistical model                                     | k        | AIC <sub>c</sub> | $w_i$       | Log-lik       | Models compared | L ratio      | p             |
|-------------------------------------------------------|----------|------------------|-------------|---------------|-----------------|--------------|---------------|
| <i>Syrphids</i>                                       |          |                  |             |               |                 |              |               |
| 1) direction + week                                   | 5        | 62.84            | 0.06        | -25.71        |                 |              |               |
| <b>2) direction + adjacent + week</b>                 | <b>8</b> | <b>57.36</b>     | <b>0.91</b> | <b>-18.83</b> | <b>1 vs 2</b>   | <b>13.75</b> | <b>0.0033</b> |
| 3) direction x adjacent + direction + adjacent + week | 11       | 64.15            | 0.03        | -17.41        | 2 vs 3          | 2.84         | 0.42          |
| <i>Toxomerus marginatus</i>                           |          |                  |             |               |                 |              |               |
| <b>1) direction + week</b>                            | <b>5</b> | <b>79.92</b>     | <b>0.76</b> | <b>-34.24</b> |                 |              |               |
| 2) direction + adjacent + week                        | 8        | 82.29            | 0.23        | -31.3         | 1 vs 2          | 5.89         | 0.12          |
| 3) direction x adjacent + direction + adjacent + week | 11       | 89.39            | 0.01        | -30.03        | 2 vs 3          | 2.54         | 0.47          |
| <i>Eupeodes americanus</i>                            |          |                  |             |               |                 |              |               |
| 1) direction + week                                   | 5        | 76.15            | 0.06        | -32.36        |                 |              |               |
| <b>2) direction + adjacent + week</b>                 | <b>8</b> | <b>70.75</b>     | <b>0.9</b>  | <b>-25.53</b> | <b>1 vs 2</b>   | <b>13.67</b> | <b>0.0034</b> |
| 3) direction x adjacent + direction + adjacent + week | 11       | 77.16            | 0.04        | -23.91        | 2 vs 3          | 3.23         | 0.36          |
| <i>Coccinellids</i>                                   |          |                  |             |               |                 |              |               |
| 1) direction + week                                   | 5        | 40.27            | 0.21        | -14.42        |                 |              |               |
| <b>2) direction + adjacent + week</b>                 | <b>8</b> | <b>37.7</b>      | <b>0.76</b> | <b>-9.01</b>  | <b>1 vs 2</b>   | <b>10.82</b> | <b>0.0127</b> |
| 3) direction x adjacent + direction + adjacent + week | 11       | 44.36            | 0.03        | -7.51         | 2 vs 3          | 2.99         | 0.39          |
| <i>All other predators combined</i>                   |          |                  |             |               |                 |              |               |
| <b>1) direction + week</b>                            | <b>5</b> | <b>41.12</b>     | <b>0.82</b> | <b>-14.84</b> |                 |              |               |
| 2) direction + adjacent + week                        | 8        | 44.65            | 0.14        | -12.48        | 1 vs 2          | 4.73         | 0.19          |
| 3) direction x adjacent + direction + adjacent + week | 11       | 47.02            | 0.04        | -8.84         | 2 vs 3          | 7.27         | 0.064         |

Table S5. Average predator movement into and out of soybean fields adjacent to alfalfa, canola, spring wheat, and woody vegetation of the main predator groups across weeks (n=2) and study sites (n=12) from bi-directional Malaise traps. Means  $\pm$  standard errors are presented.

|                              | Alfalfa          |                  | Canola            |                   | Wheat             |                   | Woody             |                   |
|------------------------------|------------------|------------------|-------------------|-------------------|-------------------|-------------------|-------------------|-------------------|
|                              | Into soybean     | Out of soybean   | Into soybean      | Out of soybean    | Into soybean      | Out of soybean    | Into soybean      | Out of soybean    |
| Coccinellids                 | 0.79 $\pm$ 0.19  | 0.71 $\pm$ 0.26  | 1.88 $\pm$ 0.21   | 1.10 $\pm$ 0.23   | 2.61 $\pm$ 1.33   | 0.92 $\pm$ 0.43   | 0.67 $\pm$ 0.50   | 0.17 $\pm$ 0.063  |
| Syrphids                     | 32.60 $\pm$ 9.82 | 36.76 $\pm$ 7.42 | 149.1 $\pm$ 50.10 | 128.8 $\pm$ 24.61 | 203.6 $\pm$ 79.10 | 120.6 $\pm$ 46.55 | 50.30 $\pm$ 38.25 | 15.54 $\pm$ 10.67 |
| <i>Toxomerus marginatus</i>  | 8.24 $\pm$ 1.84  | 16.12 $\pm$ 4.65 | 73.88 $\pm$ 46.64 | 70.87 $\pm$ 27.95 | 15.05 $\pm$ 5.93  | 25.67 $\pm$ 10.32 | 16.36 $\pm$ 13.12 | 8.27 $\pm$ 6.23   |
| <i>Eupeodes americanus</i>   | 19.33 $\pm$ 8.88 | 15.38 $\pm$ 7.73 | 58.33 $\pm$ 8.10  | 50.90 $\pm$ 19.03 | 179.3 $\pm$ 76.35 | 90.34 $\pm$ 35.82 | 28.12 $\pm$ 22.30 | 5.62 $\pm$ 4.16   |
| All other predators combined | 2.02 $\pm$ 0.52  | 1.62 $\pm$ 0.38  | 1.92 $\pm$ 0.65   | 5.98 $\pm$ 2.68   | 1.52 $\pm$ 0.20   | 1.55 $\pm$ 0.37   | 1.53 $\pm$ 0.46   | 0.36 $\pm$ 1.78   |
